# Supplementary material for: Nanostructured Lipid Carriers (NLC)-Based Gel Formulations as Etodolac Delivery: From Gel Preparation to Permeation Study
Source: MDPI journal article supplement (doi:10.3390/molecules28010235), 2022-12-28
Supplement: s1 [file s1]

# Supplementary Materials: Nanostructured Lipid Carriers (NLC)-Based Gel Formulations as Etodolac Delivery: From Gel Preparation to Permeation Study

Anna Czajkowska-Kośnik, Emilia Szymańska, Katarzyna Winnicka

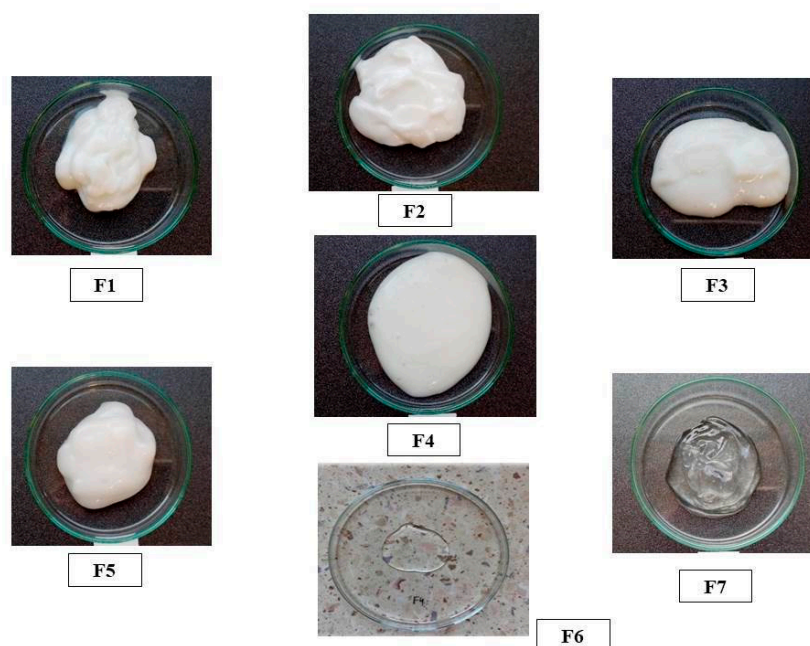

**Figure S1.** Visual observation of the gel formulations.

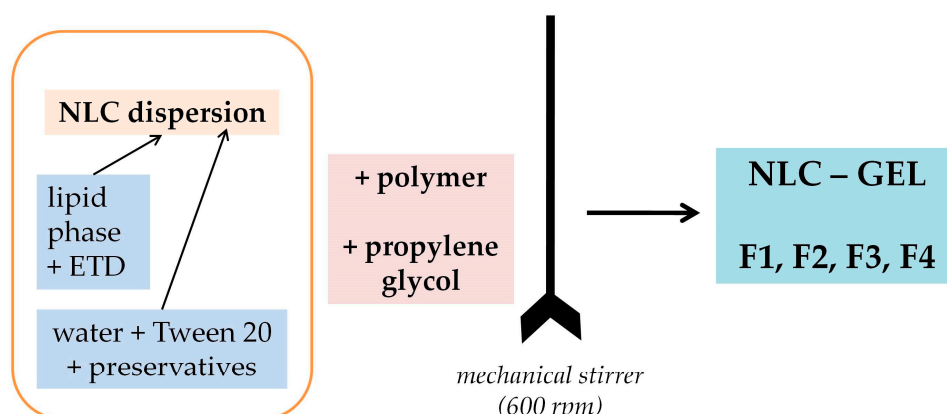

**Figure S2.** Technology of NLC-gels (F1- F4) preparation.

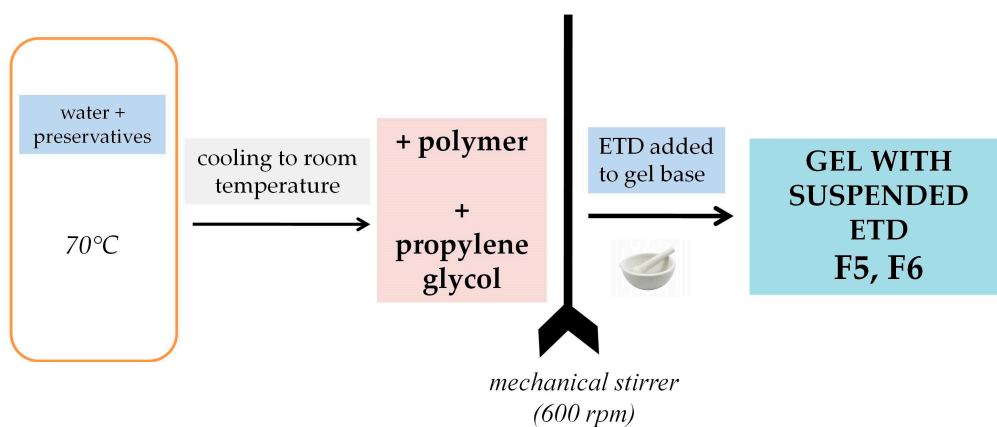

**Figure S3.** Technology of gels with suspended ETD (F5, F6) preparation.

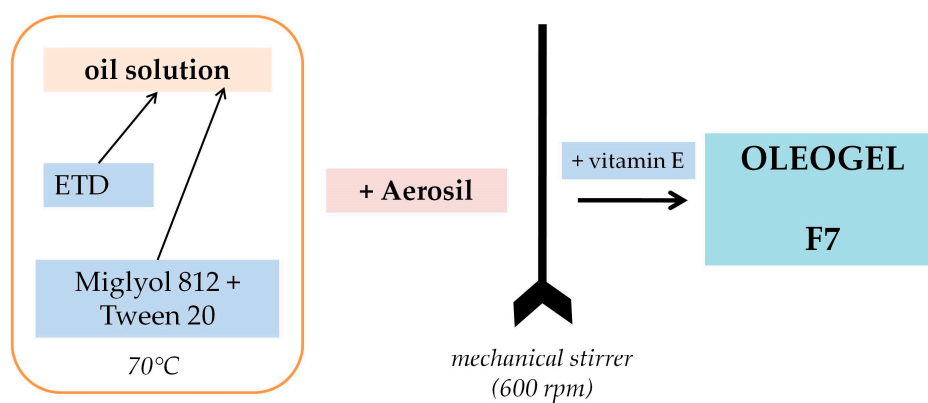

**Figure S4.** Technology of oleogel (F7) preparation.
