# Supplementary material for: Nanostructured Lipid Carriers (NLC)-Based Gel Formulations as Etodolac Delivery: From Gel Preparation to Permeation Study
Source: Molecules. 2022 Dec 28;28(1):235. doi: 10.3390/molecules28010235 (PMC9821982; doi:10.3390/molecules28010235)
Supplement: Supplementary file 1 [file molecules-28-00235-s001.zip]

Archive with 5 entries (5 files):
- Figure S1.jpg
- Figure S2.jpg
- Figure S3.jpg
- Figure S4.jpg
- molecules-2118026-Supplementary Materials.pdf
